# Supplementary material for: A versatile 3D tissue matrix scaffold system for tumor modeling and drug screening
Source: PubMed Central journal article supplement — Sci Adv. 2017 Sep 13;3(9):e1700764. doi: 10.1126/sciadv.1700764 (PMC5597314; doi:10.1126/sciadv.1700764), 2017-09-13
Supplement: 1700764_SM.pdf [file 1700764_SM.pdf]

## Supplementary Materials for **A versatile 3D tissue matrix scaffold system for tumor modeling and drug screening**

Girdhari Rijal and Weimin Li

Published 13 September 2017, *Sci. Adv.* **3**, e1700764 (2017)

DOI: 10.1126/sciadv.1700764

### **The PDF file includes:**

- fig. S1. Comparison of the differences of the major proteins identified from TMS/mouse mammary tissue ECM versus those from lrECM hydrogel.
- fig. S2. Monitor tumor growth with x-ray-based imaging.
- fig. S3. Tumor development from the cancer cell-laden scaffolds in mice mammary tissues.
- fig. S4. Quantification of the capillary areas on the cross sections of the tumors.
- fig. S5. Histological examination of the tumors developed from the cancer cells grown on the PLGA scaffolds.
- fig. S6. Analysis of T47D and BT474 cell proliferation on the different scaffolds and the potential of using the systems in drug screening.
- fig. S7. Cancer cell survival and growth status on TMS after drug treatment.
- fig. S8. Cancer cell survival and growth status on PLGA scaffolds after drug treatment.
- table S1. The major proteins identified in the lrECM.
- Legend for movie S1

### **Other Supplementary Material for this manuscript includes the following:** (available at [advances.sciencemag.org/cgi/content/full/3/9/e1700764/DC1](http://advances.sciencemag.org/cgi/content/full/3/9/e1700764/DC1))

- movie S1 (.mp4 format). Testing the sponginess of the TMS scaffolds.

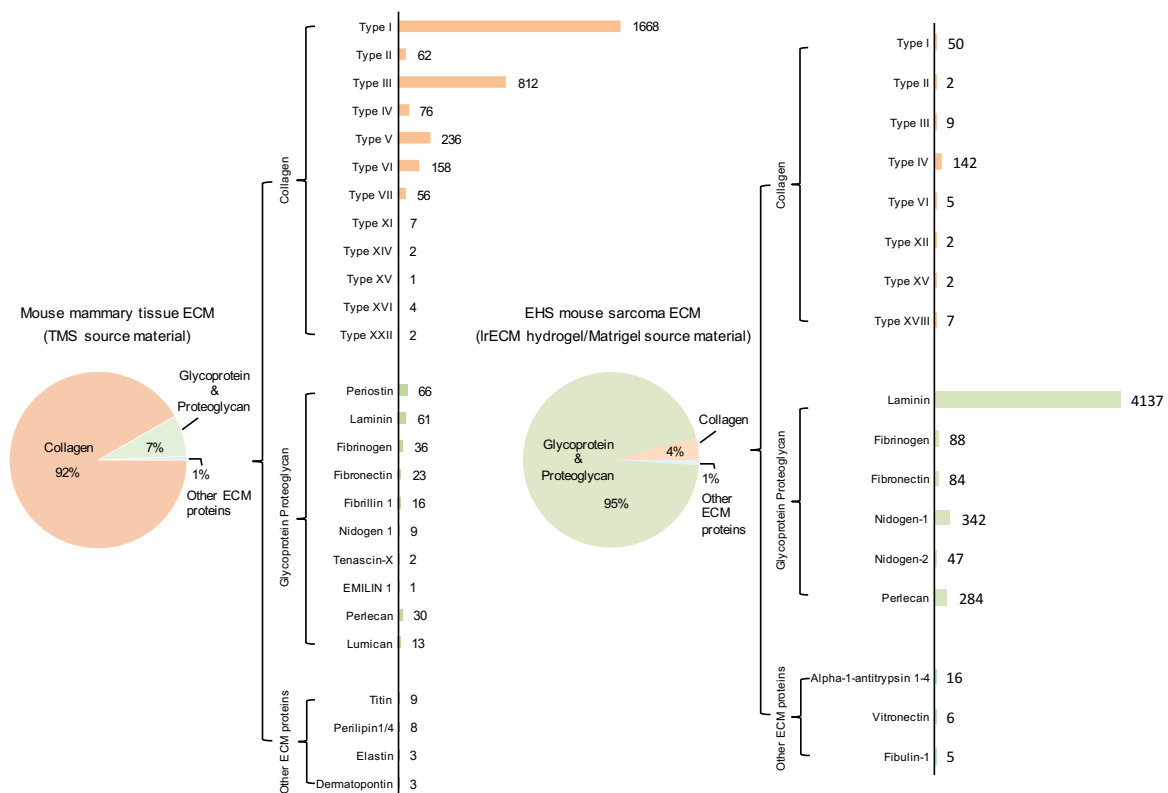

**fig. S1. Comparison of the differences of the major proteins identified from TMS/mouse mammary tissue ECM vs. those from IrECM hydrogel.** The ECM proteins listed in Table 1 and Supplementary table 1 were grouped and compared side-by-side. The spectrum counts of the different subunits or chains of a same protein were added up to represent the relative abundance of the functional protein within the ECM.

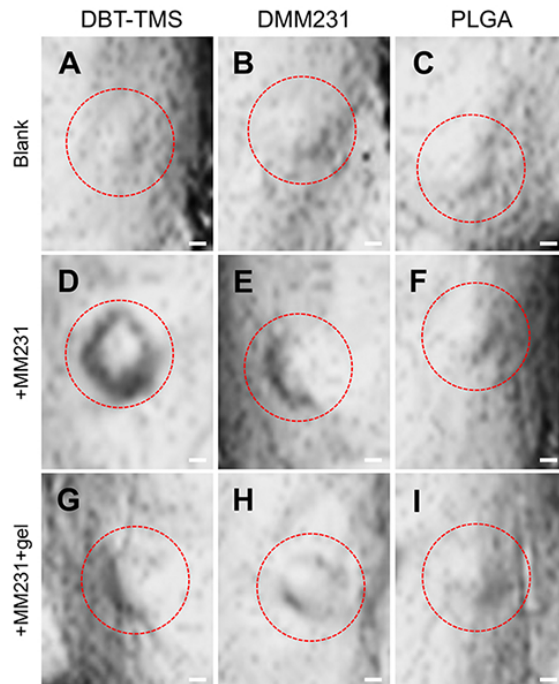

**fig. S2. Monitor tumor growth with x-ray-based imaging.** CT images of the tumors originated from the 3D scaffolds coated with or without the MM231 cancer cells in the presence or absence of an outer TMS hydrogel layer were taken 3 weeks after implantation of the scaffolds into the animals. Scale bars, 4 mm.

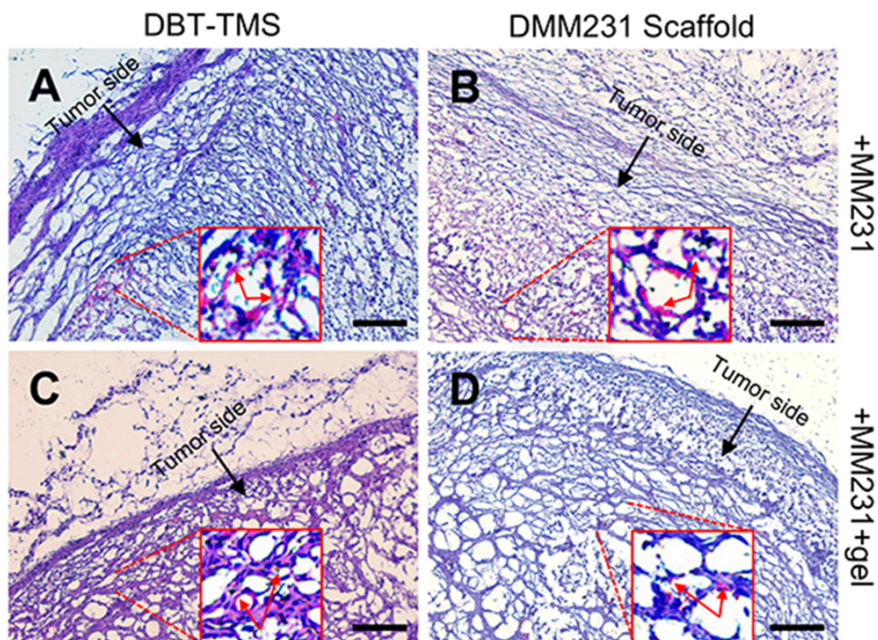

**fig. S3. Tumor development from the cancer cell-laden scaffolds in mice mammary tissues.** H&E staining of the cross sections of the tumors derived from the

MM231 cell-laden DBT-TMS and DMM231 scaffolds in the presence or absence of a layer of hydrogel covered outside of the seeded cells. The ECM architectures, overall cell distribution and microvessels (blowup insets, with arrows pointed to the red blood cell-containing capillaries) within the tumors are displayed. Scale bars, 100  $\mu$ m. The representative blowup views of the stained sections were demonstrated in Fig. 4C, i - iv.

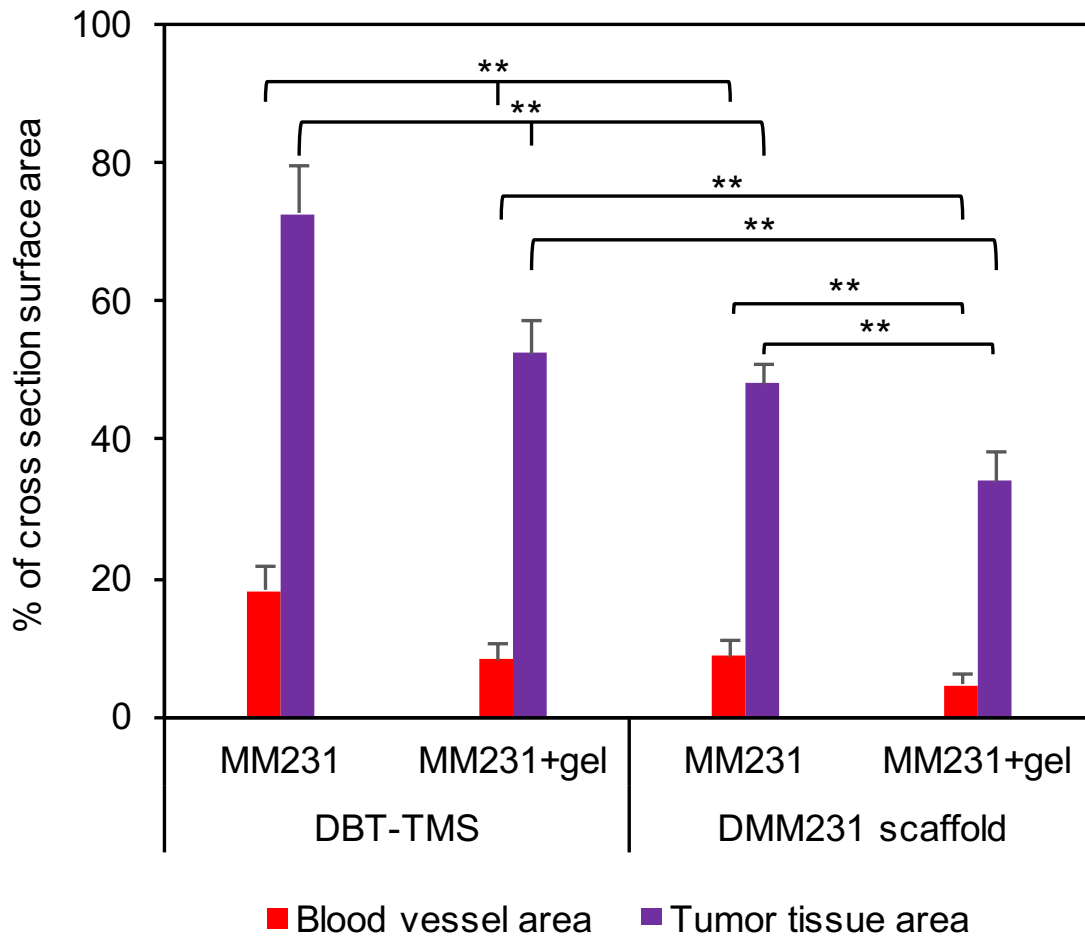

**fig. S4. Quantification of the capillary areas on the cross sections of the tumors.**

H&E stained cross sections of the tumors were analyzed for the occupancies of the blood vessels relative to the solid tumor tissues as described in the methods. Error bars represent the SD of the means of the values from 3 consecutive slides (per tumor) of 3 replicate tumors. \*\* $P < 0.01$ : comparisons of the counterpart samples between the

different scaffold groups or the samples within the same scaffold group in the presence or absence of the hydrogel coverage.

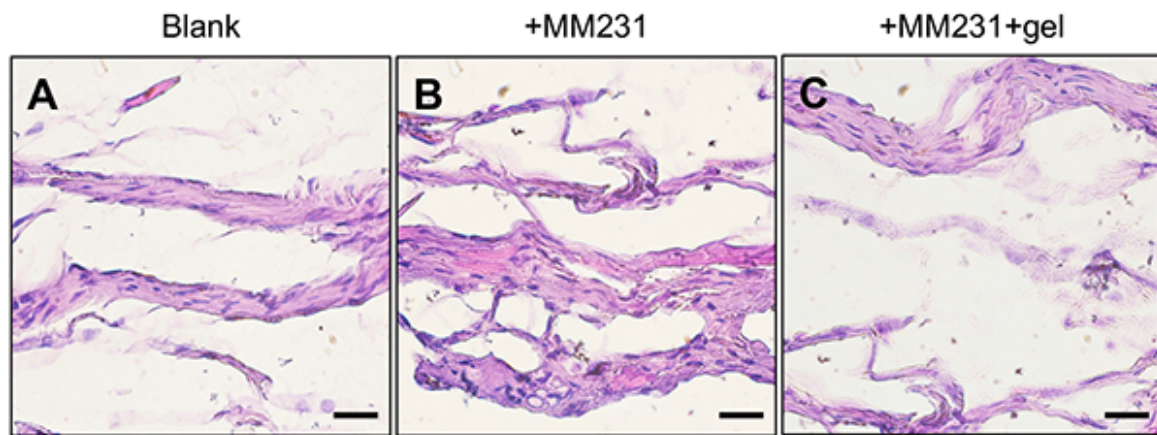

**fig. S5. Histological examination of the tumors developed from the cancer cells grown on the PLGA scaffolds.** H&E staining of the cross sections of the implanted PLGA scaffolds with or without the MM231 cells and a hydrogel outer layer showed underdeveloped and disorganized ECM structures as well as limited cell infiltration into the ECM. Scale bars, 100  $\mu\text{m}$ .

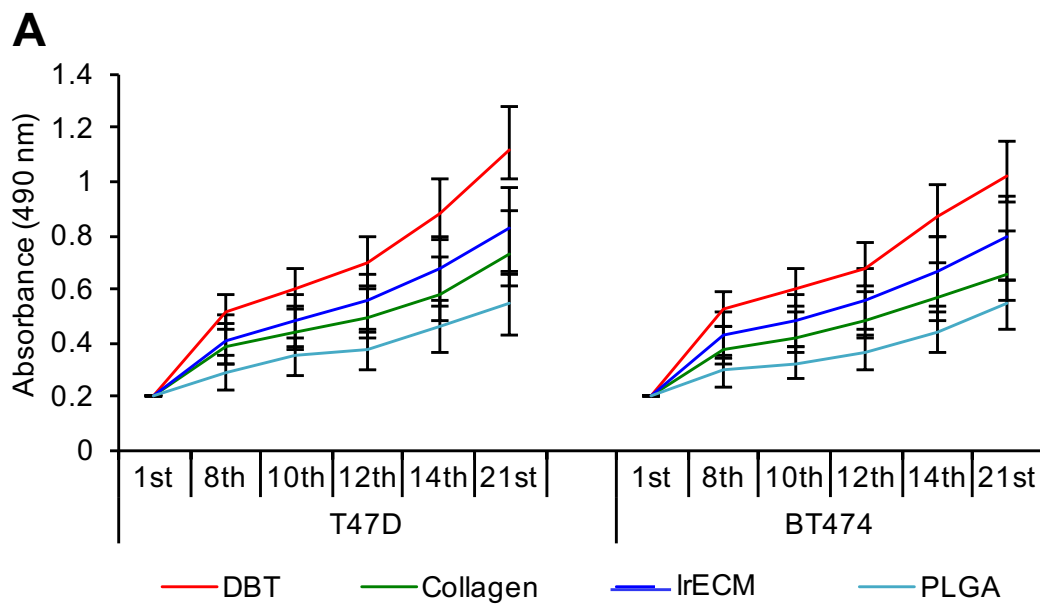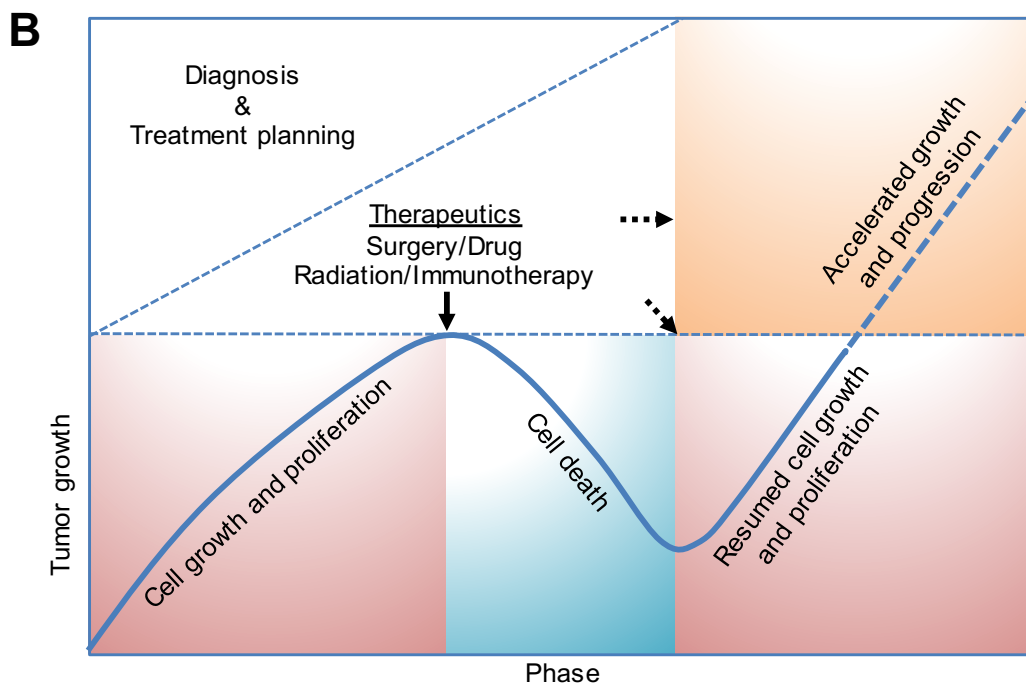

**fig. S6. Analysis of T47D and BT474 cell proliferation on the different scaffold as well as the potential of using the systems in drug screening. (A)** The proliferation of T47D and BT474 cells grown on the different scaffolds was evaluated with cell proliferation assays. The analysis of the data collected from the indicated time points served as a reference for the drug tests shown in Fig. 5. Error bars represent the SD of the means of 3 independent experiments. **(B)** The clinical trends of tumor development and response to treatment. The tumor growth over the phase of cell

proliferation status in response to therapeutic interventions was depicted. The dotted arrows indicate the additional treatment options during the disease progression.

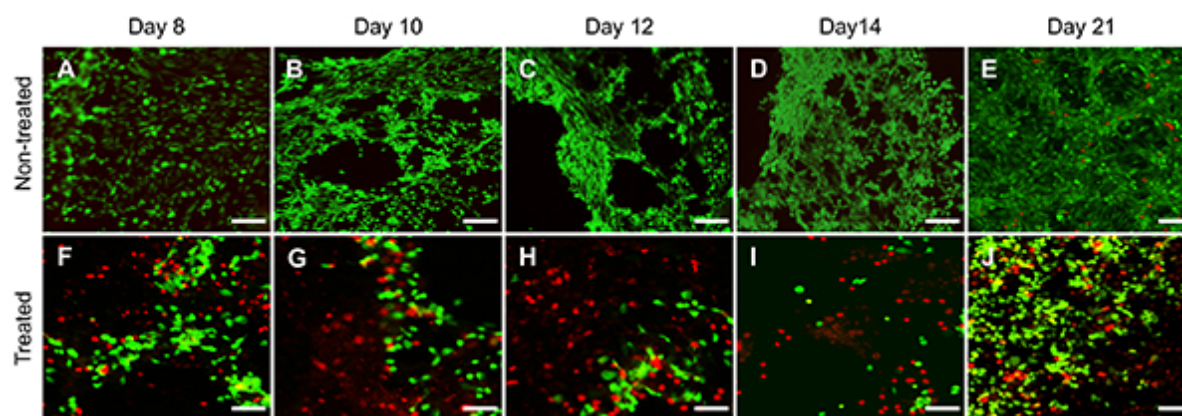

**fig. S7. Cancer cell survival and growth status on TMS after drug treatment.** In addition to the proliferation assays shown in Fig. 5A, the sensitivities of T47D or BT474 cells grown on the DBT-TMSs to HT or Taxol treatment were inspected using Live/Dead Cell staining at different time points. Only the T47D/TMS  $\pm$  HT results were shown here, with the similar patterns were observed in the BT474/TMS  $\pm$  HT and the T47D/TMS  $\pm$  Taxol or the BT474/TMS  $\pm$  Taxol samples (data not shown). The green and the red signals indicate the live and the dead cells, respectively. Scale bars, 100  $\mu$ m.

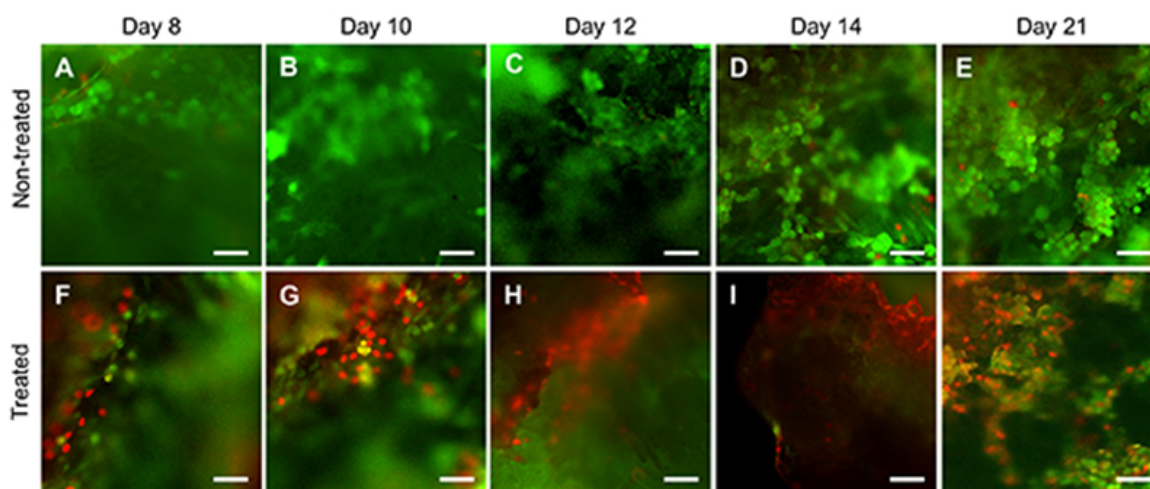

**fig. S8. Cancer cell survival and growth status on PLGA scaffolds after drug treatment.** The sensitivities of the T47D or BT474 cells grown on the PLGA scaffolds

to the anticancer drugs were assessed with Live/Dead Cell staining at different time points. The results of the T47D/PLGA ± HT samples were displayed, with the similar patterns were observed in the BT474/PLGA ± HT and the T47D/PLGA ± Taxol or the BT474/PLGA ± Taxol samples (data not shown). Scale bars, 150 µm.

**table S1. The major proteins identified in the IrECM.** The proteins were grouped according to their similarities in a family or functions in the ECM, and listed from high to low spectrum counts.

|                                 | #  | Protein                           | Gene      | Accession number | Molecular mass (kDa) | Spectrum count |
|---------------------------------|----|-----------------------------------|-----------|------------------|----------------------|----------------|
| Collagen                        | 1  | Collagen type IV alpha 2 chain    | Col4a2    | P08122           | 167                  | 87             |
|                                 | 2  | Collagen type IV alpha 1 chain    | Col4a1    | P02463           | 161                  | 55             |
|                                 | 3  | Collagen type I alpha 1 chain     | Col1a1    | P11087           | 138                  | 35             |
|                                 | 4  | Collagen type I alpha 2 chain     | Col1a2    | Q01149           | 130                  | 15             |
|                                 | 5  | Collagen type III alpha 1 chain   | Col3a1    | P08121           | 139                  | 9              |
|                                 | 6  | Collagen type XVIII alpha 1 chain | Col18a1   | E9QPX1           | 182                  | 7              |
|                                 | 7  | Collagen type VI alpha 1 chain    | Col6a1    | Q04857           | 108                  | 5              |
|                                 | 8  | Collagen type II alpha 1 chain    | Col2a1    | P28481           | 142                  | 2              |
|                                 | 9  | Collagen type XII alpha 2 chain   | Col12a1   | Q60847           | 340                  | 2              |
|                                 | 10 | Collagen type XV alpha 1 chain    | Col15a1   | A2AJY2 (+1)      | 138                  | 2              |
| Glycoprotein & proteoglycan/GAG | 11 | Laminin subunit alpha 1           | Lama1     | F8VQ40           | 338                  | 1567           |
|                                 | 12 | Laminin subunit gamma 1           | Lamc1     | F8VQJ3           | 177                  | 1324           |
|                                 | 13 | Laminin subunit beta 1            | Lamb1     | E9QN70 (+1)      | 202                  | 1205           |
|                                 | 14 | Laminin subunit alpha 5           | Lama5     | Q61001           | 404                  | 28             |
|                                 | 15 | Laminin subunit beta 2            | Lamb2     | Q61292           | 197                  | 10             |
|                                 | 16 | Laminin subunit alpha 4           | Lama4     | P97927           | 202                  | 3              |
|                                 | 17 | Nidogen-1                         | Nid1      | P10493           | 137                  | 342            |
|                                 | 18 | Nidogen-2                         | Nid2      | O88322           | 154                  | 47             |
|                                 | 19 | Perlecan                          | Hspg2     | E9PZ16           | 470                  | 284            |
|                                 | 20 | Fibronectin                       | Fn1       | P11276           | 273                  | 84             |
|                                 | 21 | Fibrinogen beta chain             | Fgb       | Q8K0E8           | 55                   | 40             |
|                                 | 22 | Fibrinogen gamma chain            | Fgg       | Q8VCM7           | 49                   | 33             |
|                                 | 23 | Fibrinogen alpha chain            | Fga       | E9PV24 (+1)      | 87                   | 15             |
| Other ECM proteins              | 24 | Alpha-1-antitrypsin 1-4           | Serpina1d | Q00897           | 46                   | 16             |
|                                 | 25 | Vitronectin                       | Vtn       | P29788           | 55                   | 6              |
|                                 | 26 | Fibulin-1                         | Fbln1     | Q08879           | 78                   | 5              |



**movie S1. Testing the sponginess of the TMS scaffolds.** The video showed the sponginess or resilience of the TMS scaffolds, which were able to return to their original shapes after releasing the applied pressure.
